# Supplementary material for: Spontaneous asymmetric crystallization of a quartz-type framework from achiral precursors
Source: Royal Society of Chemistry journal article supplement (doi:10.1039/c2dt12238c), 2012-01-01
Supplement: c2dt12238c.pdf [file c2dt12238c.pdf]

## Spontaneous asymmetrical crystallization of a quartz-type framework from achiral precursors

Wenxu Zheng,<sup>ab</sup> Yongqin Wei,<sup>a</sup> Xueying Xiao,<sup>ab</sup> and Kechen Wu<sup>a\*</sup>

<sup>a</sup> State Key Laboratory of Structure Chemistry, Fujian Institute of Research on the Structure of Matter, Chinese Academy of Sciences, Fuzhou, Fujian 350002, P. R. China

<sup>b</sup> Graduate School of Chinese Academy of Sciences, Beijing 100039, P. R. China.

\* The corresponding author, Tel: (+86)- 591-83792600; E-mail: [wkc@fjirsm.ac.cn](mailto:wkc@fjirsm.ac.cn)

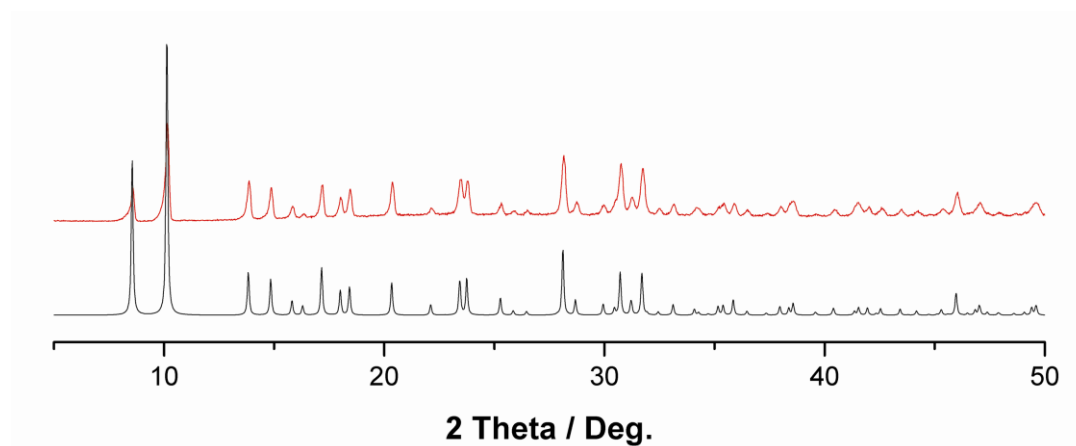

**Figure S1.** XPRD patterns for **1** (top, red) experimental at room temperature; (bottom, black) calculated on the basis of the structure determined by single-crystal X-ray diffraction.

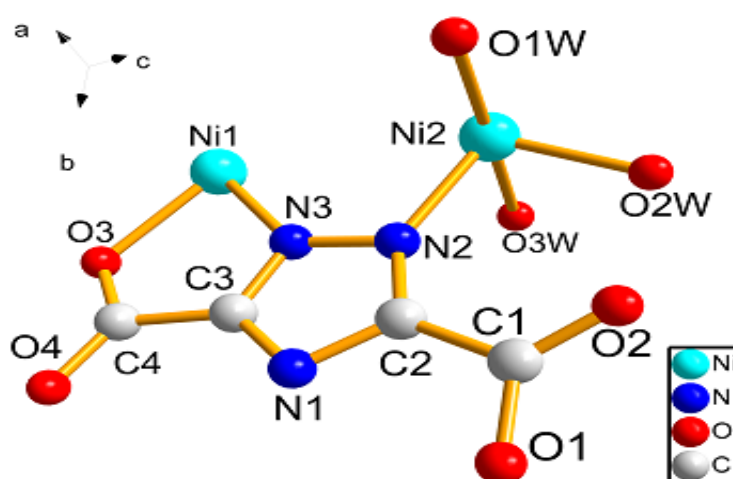

**Figure S2.** The crystallographic asymmetric unit in compound **1**. Hydrogen atoms are omitted for clarity.

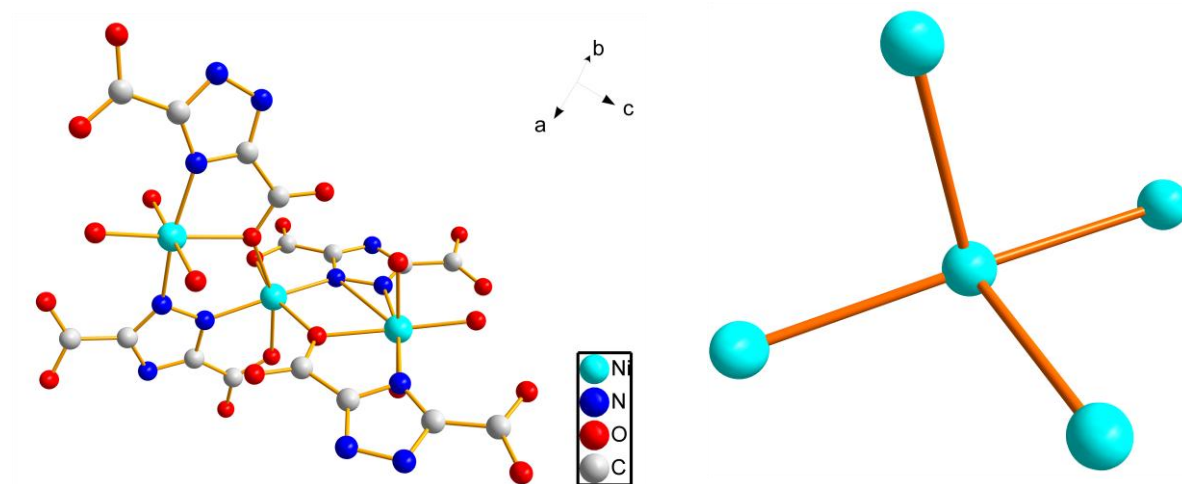

**Figure S3.** Left: the trinuclear SBU and tetrahedron building block in compound **1**; Right: the node (represent trinuclear SBU) and rod (represent ligand) of topology.

**Table S1** A summary of the 10 structure determinations of **1** with the R factors and Flack absolute structure parameters for each refinement.

|      | Space group                | a = b        | c           | R <sub>1</sub> | wR <sub>2</sub> | Flack parameter |
|------|----------------------------|--------------|-------------|----------------|-----------------|-----------------|
| 1-1  | <i>P</i> 3 <sub>1</sub> 21 | 11.92450(10) | 16.3020(5)  | 0.0444         | 0.1223          | 0.02(2)         |
| 1-2  | <i>P</i> 3 <sub>1</sub> 21 | 11.9265(5)   | 16.3060(11) | 0.0529         | 0.1444          | 0.01(3)         |
| 1-3  | <i>P</i> 3 <sub>1</sub> 21 | 11.910(9)    | 16.306(13)  | 0.0556         | 0.1468          | 0.02(3)         |
| 1-4  | <i>P</i> 3 <sub>1</sub> 21 | 11.9386(5)   | 16.2986(15) | 0.0958         | 0.2183          | 0.01(5)         |
| 1-5  | <i>P</i> 3 <sub>1</sub> 21 | 11.9130(8)   | 16.2942(19) | 0.0898         | 0.1951          | 0.01(5)         |
| 1-6  | <i>P</i> 3 <sub>1</sub> 21 | 11.9224(4)   | 16.2261(11) | 0.0657         | 0.1439          | 0.03(3)         |
| 1-7  | <i>P</i> 3 <sub>1</sub> 21 | 11.9250(4)   | 16.2715(10) | 0.0401         | 0.1132          | 0.01(2)         |
| 1-8  | <i>P</i> 3 <sub>1</sub> 21 | 11.9298(4)   | 16.4486(8)  | 0.0527         | 0.1380          | 0.03(3)         |
| 1-9  | <i>P</i> 3 <sub>1</sub> 21 | 11.8921(6)   | 16.248(2)   | 0.0478         | 0.1304          | 0.01(3)         |
| 1-10 | <i>P</i> 3 <sub>2</sub> 21 | 11.9029(6)   | 16.2687(15) | 0.0848         | 0.2255          | 0.04(5)         |

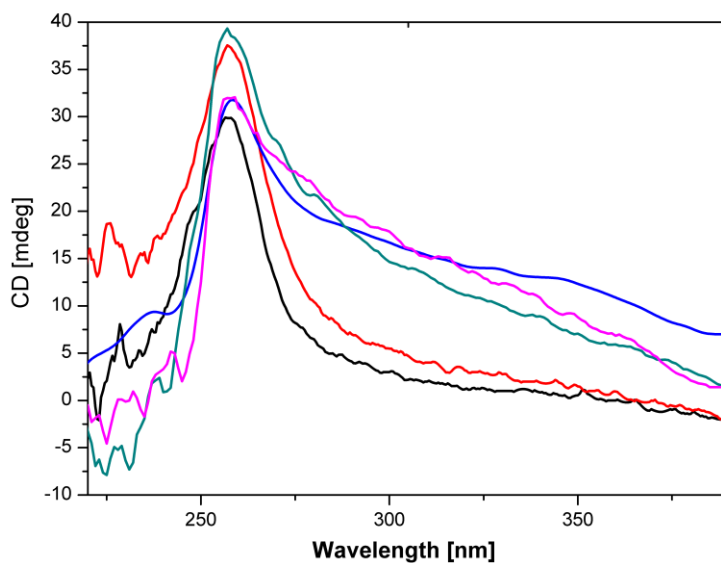

**Figure S4.** The solid-state CD spectra of each whole batch from 5 parallel products.

CD spectra of each whole batch from 5 parallel hydrothermal syntheses were measured in solid-state. The mixture of 0.6g sample and 1.2g dried KCl powder was grinded for 30 minute, and then 20 mg sample was picked out from the well-ground powder for use in CD measurement.

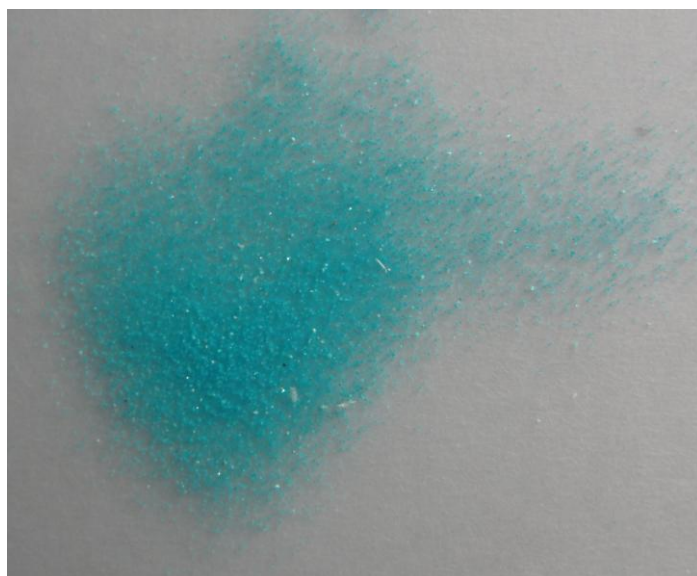

**Figure S5.** The image of green products.

**Magnetic properties:** Magnetic susceptibilities were measured for **1** with a Quantum Design MPMS-XL system.

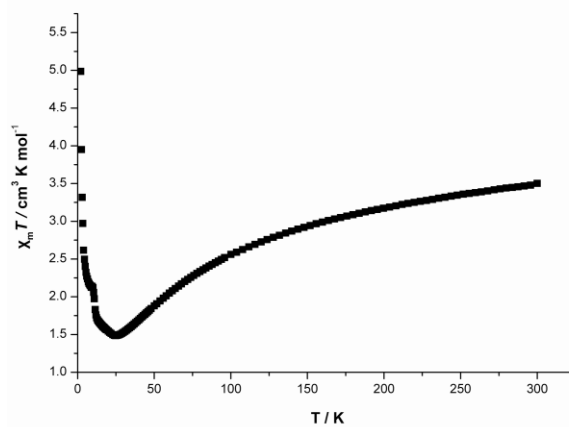

**Figure S4.** Plot of  $\chi_m T$  vs.  $T$  for **1** at 1000 oe.

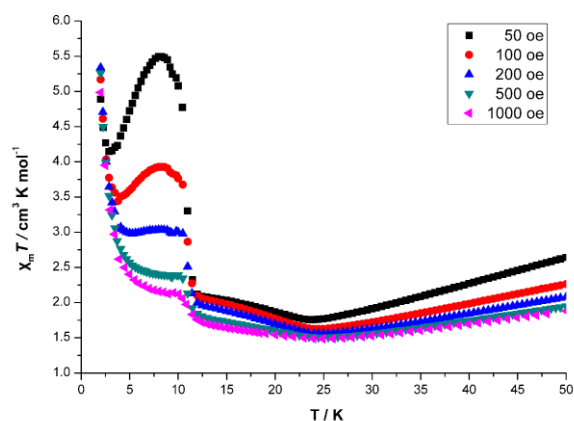

**Figure S5.** Plot of  $\chi_m T$  vs.  $T$  under different fields at low temperature.

A plot of  $\chi_m T$  vs.  $T$  per Ni3 unit under a applied field of 1000 oe for **1** is shown in Figure S1. Upon cooling, the  $\chi_m T$  undergoes a gradual decrease down to  $1.46 \text{ cm}^3 \text{ K mol}^{-1}$  around 25 K. Below 25 K, the  $\chi_m T$  product increases rapidly to a sharp maximum of  $4.98 \text{ cm}^3 \text{ K mol}^{-1}$  at 2 K. As shown in Figure S2, the  $\chi_m T$  curve is field dependent and disappears at higher field. Such behavior can well be expected for a canted spin system.

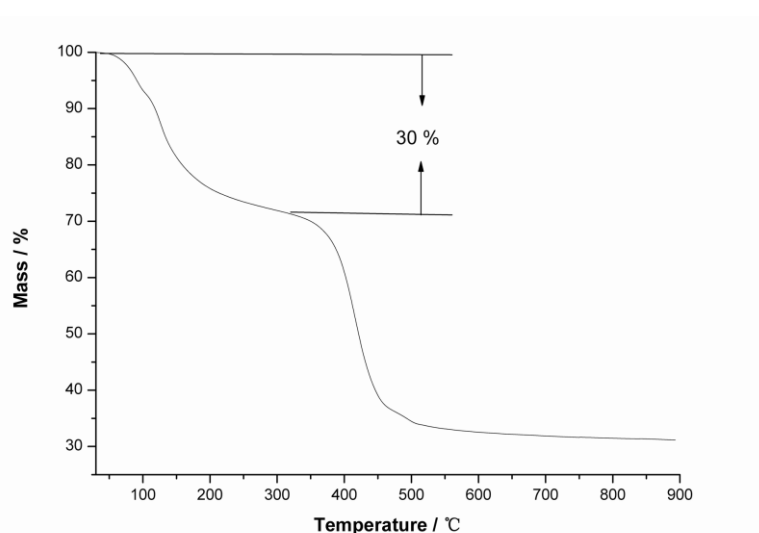

**Figure S6.** The TGA diagram of **1**. The weight of 30% is corresponding to the loss of uncoordinated and coordinated water molecules.
